# Supplementary material for: Sensitive absorptive refocused scalar correlation NMR spectroscopy in solids
Source: Royal Society of Chemistry journal article supplement (doi:10.1039/b818867j), 2009-01-01
Supplement: b818867j.pdf [file b818867j.pdf]

# Sensitive Absorptive Refocused Scalar Correlation NMR Spectroscopy in Solids

Daniel Lee, Jochem Struppe, Douglas W. Elliott, Leonard J. Mueller and Jeremy J. Titman

## Supplementary Information

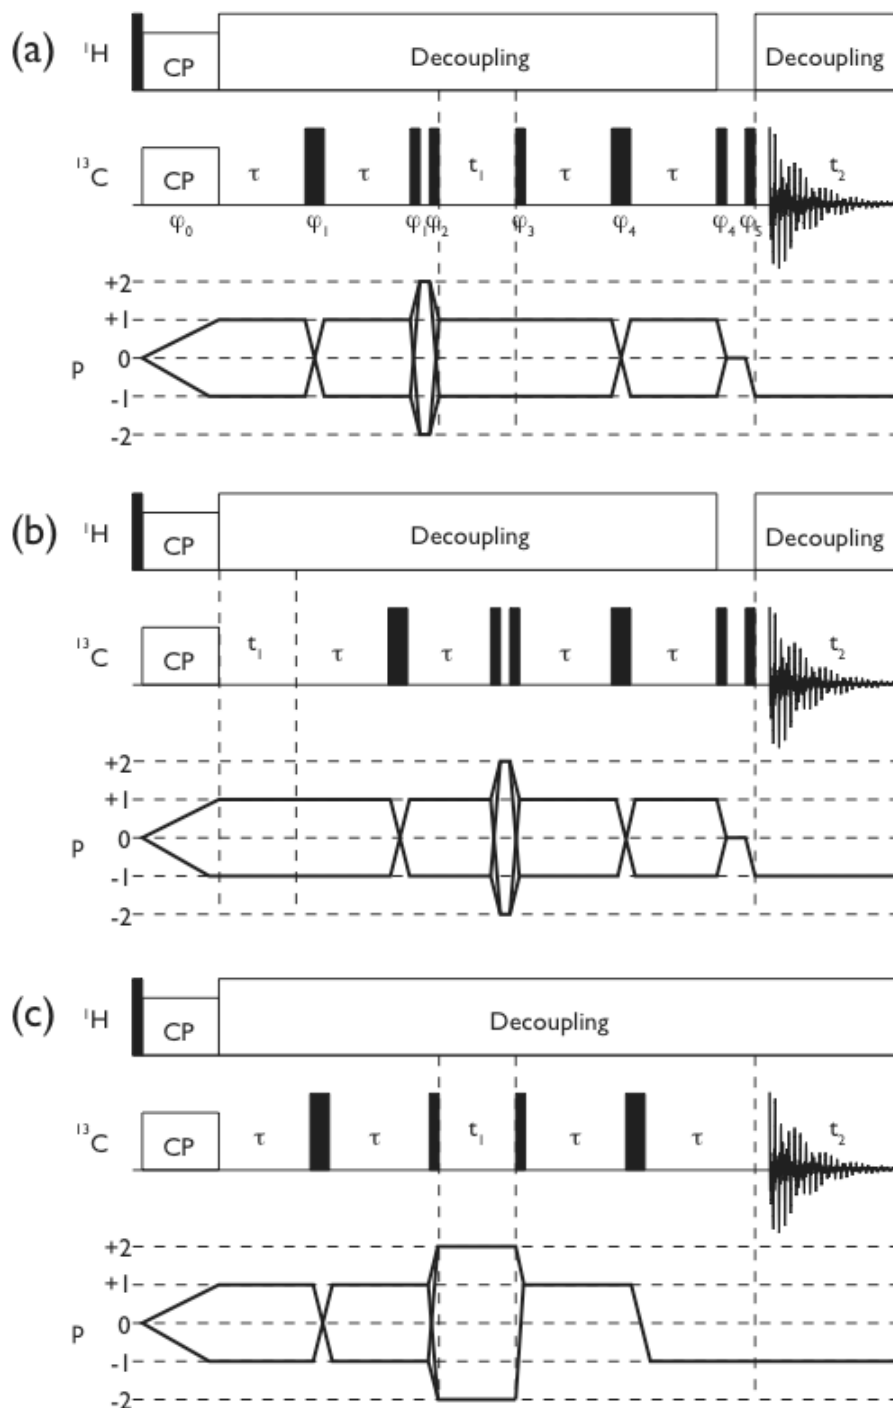

**Fig. S1.** Pulse sequences used to record (a) SAR-COSY (b) UC2QF-COSY and (c) refocused INADEQUATE scalar correlation spectra with the corresponding coherence transfer pathways for carbon-13. Narrow and wide filled vertical bars represent  $\pi/2$  and  $\pi$  pulses, respectively.

| Phase               | Cycle |   |   |   |   |   |   |   |   |   |   |   |   |   |   |   |   |   |   |   |   |   |   |   |   |   |   |   |   |   |   |   |   |   |   |   |   |   |   |
|---------------------|-------|---|---|---|---|---|---|---|---|---|---|---|---|---|---|---|---|---|---|---|---|---|---|---|---|---|---|---|---|---|---|---|---|---|---|---|---|---|---|
| $\phi_0$            | 1     | 1 | 1 | 1 | 1 | 1 | 1 | 1 | 1 | 1 | 1 | 1 | 1 | 1 | 1 | 1 | 1 | 1 | 1 | 1 | 1 | 1 | 1 | 1 | 1 | 1 | 1 | 1 | 1 | 1 | 1 | 1 | 1 | 1 | 1 | 1 | 1 |   |   |
| $\phi_1$            | 0     | 0 | 0 | 0 | 0 | 0 | 0 | 0 | 0 | 0 | 0 | 0 | 0 | 0 | 0 | 0 | 0 | 0 | 0 | 0 | 0 | 0 | 0 | 0 | 0 | 0 | 0 | 0 | 0 | 0 | 0 | 0 | 0 | 0 | 0 | 0 | 0 | 0 |   |
| $\phi_2$            | 0     | 0 | 0 | 0 | 0 | 0 | 0 | 0 | 0 | 1 | 1 | 1 | 1 | 1 | 1 | 1 | 1 | 2 | 2 | 2 | 2 | 2 | 2 | 2 | 2 | 2 | 3 | 3 | 3 | 3 | 3 | 3 | 3 | 3 | 3 | 3 | 3 | 3 |   |
| $\phi_3$            | 1     | 1 | 1 | 1 | 3 | 3 | 3 | 3 | 0 | 0 | 0 | 0 | 2 | 2 | 2 | 2 | 1 | 1 | 1 | 1 | 3 | 3 | 3 | 3 | 0 | 0 | 0 | 0 | 2 | 2 | 2 | 2 | 2 | 2 | 2 | 2 | 2 | 2 | 2 |
| $\phi_4$            | 0     | 0 | 0 | 0 | 0 | 0 | 0 | 0 | 1 | 1 | 1 | 1 | 1 | 1 | 1 | 1 | 0 | 0 | 0 | 0 | 0 | 0 | 0 | 0 | 0 | 0 | 1 | 1 | 1 | 1 | 1 | 1 | 1 | 1 | 1 | 1 | 1 | 1 |   |
| $\phi_5$            | 0     | 1 | 2 | 3 | 0 | 1 | 2 | 3 | 0 | 1 | 2 | 3 | 0 | 1 | 2 | 3 | 0 | 1 | 2 | 3 | 0 | 1 | 2 | 3 | 0 | 1 | 2 | 3 | 0 | 1 | 2 | 3 | 0 | 1 | 2 | 3 | 0 | 1 |   |
| $\phi_{\text{rec}}$ | 0     | 1 | 2 | 3 | 0 | 1 | 2 | 3 | 2 | 3 | 0 | 1 | 2 | 3 | 0 | 1 | 2 | 3 | 0 | 1 | 2 | 3 | 0 | 1 | 2 | 3 | 0 | 1 | 0 | 1 | 2 | 3 | 0 | 1 | 2 | 3 | 0 | 1 |   |

**Table S2.** Reduced phase cycle for recording SAR-COSY scalar correlation spectra. The labels for the pulse phases refer to Figure S1. A phase of 1 corresponds to  $90^\circ$  and so on.
